# Supplementary material
Source: PubMed Central journal article supplement (PMC8250230)
Supplement: MINF-40-2000187-s001.pdf [file MINF-40-2000187-s001.pdf]

# molecular informatics

Supporting Information

## **An Integrative *in silico* Drug Repurposing Approach for Identification of Potential Inhibitors of SARS-CoV-2 Main Protease**

Nemanja Djokovic<sup>+</sup>, Dusan Ruzic<sup>+,\*</sup>, Teodora Djikic, Sandra Cvijic, Jelisaveta Ignjatovic, Svetlana Ibric, Katarina Baralic, Aleksandra Buha Djordjevic, Marijana Curcic, Danijela Djukic-Cosic, and Katarina Nikolic<sup>\*</sup>

# Supporting Information

## An integrative *in silico* drug repurposing approach for identification of potential inhibitors of SARS-CoV-2 main protease

Nemanja Djokovic <sup>[a]#</sup>, Dusan Ruzic <sup>[a]#\*</sup>, Teodora Djikic <sup>[a]</sup>, Sandra Cvijic <sup>[b]</sup>, Jelisaveta Ignjatovic <sup>[b]</sup>, Svetlana Ibric<sup>[b]</sup>, Katarina Baralic <sup>[c]</sup>, Aleksandra Buha Djordjevic <sup>[c]</sup>, Marijana Curcic <sup>[c]</sup>, Danijela Djukic-Cosic <sup>[c]</sup>, Katarina Nikolic <sup>[a]\*</sup>

---

[a] Department of Pharmaceutical Chemistry, Faculty of Pharmacy, University of Belgrade, Vojvode Stepe 450, 11221 Belgrade, Serbia

\*e-mail: [dusan.ruzic@pharmacy.bg.ac.rs](mailto:dusan.ruzic@pharmacy.bg.ac.rs), [katarina.nikolic@pharmacy.bg.ac.rs](mailto:katarina.nikolic@pharmacy.bg.ac.rs)

phone/fax: +381-11-3951-259

# equal contribution

[b] Department of Pharmaceutical Technology and Cosmetology, University of Belgrade, Faculty of Pharmacy, Vojvode Stepe 450, 11221 Belgrade, Serbia

[c] Department of Toxicology "Akademik Danilo Soldatovic", Faculty of Pharmacy, University of Belgrade, Vojvode Stepe 450, 11221 Belgrade, Serbia

# NDj and DR share equal contribution

\* DR and KN share corresponding authorship.

**Figure S1.** Heatmap of the final results

**Table S1.** PBPK input data based on literature information

**Table S2.** QSPR predicted data used as inputs for PBPK modeling

**Table S3.** Interactions (mRNA expression, protein expression, gene expression and protein secretion) between the candidate drugs and genes obtained from the CTD database (<http://ctdbase.org>)

**List of smiles for identified compounds**

|                           | Structure-based molecular modeling | QSPR-PBPK modeling                      |                                         |                                         |                                           | Network-based drug gene-disease associations |
|---------------------------|------------------------------------|-----------------------------------------|-----------------------------------------|-----------------------------------------|-------------------------------------------|----------------------------------------------|
| Drug                      | ChemPLP score                      | AUC <sub>024 h</sub> ratio plasma/lungs | AUC <sub>024 h</sub> ratio plasma/brain | AUC <sub>024 h</sub> ratio plasma/heart | AUC <sub>024 h</sub> ratio plasma/kidneys | Detected association yes(1)/no(0)            |
| <b>Salvianolic acid B</b> | 121.036                            | 4.46                                    | 16.45                                   | 5.83                                    | 7.05                                      | 1                                            |
| Pralmorelin               | 109.378                            | 0.19                                    | 1.34                                    | 0.32                                    | 0.15                                      | 0                                            |
| Venetoclax                | 105.241                            | 1.08                                    | 0.09                                    | 0.21                                    | 0.24                                      | 0                                            |
| <b>Thymopentin</b>        | 104.279                            | 0.91                                    | 0.83                                    | 0.95                                    | 1.05                                      | no data                                      |
| Ombitasvir                | 103.241                            | 1.06                                    | 0.09                                    | 0.21                                    | 0.24                                      | 0                                            |
| <b>Atorvastatin</b>       | 98.9959                            | 4.23                                    | 5.09                                    | 4.39                                    | 5.17                                      | 1                                            |
| <b>Naringin</b>           | 98.6831                            | 3.2                                     | 5.83                                    | 3.74                                    | 4.35                                      | 1                                            |
| Astilbin                  | 97.3607                            | 3.43                                    | 2.24                                    | 2.83                                    | 3.25                                      | 0                                            |
| <b>Montelukast</b>        | 96.6682                            | 1.13                                    | 0.1                                     | 0.23                                    | 0.26                                      | 1                                            |
| <b>Dipyridamole</b>       | 95.8533                            | 1.84                                    | 0.24                                    | 0.53                                    | 0.59                                      | 1                                            |
| <b>Lopinavir</b>          | 95.676                             | 1.63                                    | 0.17                                    | 0.39                                    | 0.44                                      | 1                                            |
| Fulvestrant               | 95.3008                            | 1.05                                    | 0.09                                    | 0.21                                    | 0.24                                      | 1                                            |
| Revefenacin               | 95.111                             | 0.35                                    | 0.24                                    | 0.32                                    | 0.22                                      | 0                                            |
| Carfilzomib               | 93.5538                            | 1.71                                    | 0.19                                    | 0.43                                    | 0.49                                      | 0                                            |
| Elbasvir                  | 93.3952                            | 1.05                                    | 0.09                                    | 0.21                                    | 0.24                                      | 0                                            |
| <b>Ritonavir</b>          | 92.3031                            | 1.26                                    | 0.12                                    | 0.27                                    | 0.3                                       | 1                                            |
| Dabigatran                | 91.9956                            | 1.06                                    | 0.09                                    | 0.22                                    | 0.24                                      | 0                                            |
| Bimatoprost               | 89.745                             | 2.47                                    | 0.35                                    | 0.75                                    | 0.85                                      | 0                                            |
| Sulfapyrazone             | 89.5815                            | 4.25                                    | 6.42                                    | 4.72                                    | 5.56                                      | 0                                            |
| Ticagrelor                | 89.405                             | 1.65                                    | 0.18                                    | 0.4                                     | 0.45                                      | 0                                            |
| Mitoxantrone              | 89.1365                            | 0.1                                     | 0.54                                    | 0.16                                    | 0.08                                      | 0                                            |
| Cilnidipine               | 89                                 | 1.06                                    | 0.09                                    | 0.22                                    | 0.24                                      | 0                                            |
| Vilanterol                | 88                                 | 0.36                                    | 0.43                                    | 0.42                                    | 0.25                                      | 0                                            |
| Selexipag                 | 87.6772                            | 3.21                                    | 0.74                                    | 1.42                                    | 1.62                                      | 0                                            |
| Azilsartan                | 87.4639                            | 3.66                                    | 1.28                                    | 2.15                                    | 2.46                                      | 0                                            |
| <b>Telmisartan</b>        | 87.0781                            | 2.65                                    | 0.42                                    | 0.89                                    | 1                                         | 1                                            |
| Lifitegrast               | 86.0911                            | 4.44                                    | 15.36                                   | 5.81                                    | 6.94                                      | 0                                            |
| Lomitapide                | 85.5827                            | 1.09                                    | 0.09                                    | 0.21                                    | 0.24                                      | 0                                            |
| Neohesperidin             | 85.2324                            | 2.52                                    | 3.52                                    | 2.79                                    | 3.19                                      | 0                                            |
| Velpatasvir               | 85.0291                            | 1.06                                    | 0.09                                    | 0.22                                    | 0.24                                      | 0                                            |
| Daclatasvir               | 84.717                             | 1.26                                    | 0.12                                    | 0.27                                    | 0.3                                       | 0                                            |
| Lapatinib                 | 83.8854                            | 1.1                                     | 0.1                                     | 0.22                                    | 0.25                                      | 0                                            |
| Bazedoxifene              | 83.5454                            | 0.84                                    | 0.09                                    | 0.21                                    | 0.22                                      | 1                                            |
| Telaprevir                | 81.9339                            | 2.41                                    | 0.42                                    | 0.88                                    | 1                                         | 0                                            |
| Penfluridol               | 81.868                             | 0.9                                     | 0.09                                    | 0.21                                    | 0.23                                      | 0                                            |
| Bortezomib                | 81.4749                            | 3.72                                    | 7.22                                    | 4.39                                    | 5.16                                      | 1                                            |
| Repaglinid                | 81.3973                            | 2.38                                    | 0.36                                    | 0.77                                    | 0.85                                      | 0                                            |
| Atazanavir                | 79.4297                            | 1.58                                    | 0.17                                    | 0.38                                    | 0.43                                      | 1                                            |
| Nintedanib                | 78.5359                            | 0.44                                    | 0.21                                    | 0.33                                    | 0.25                                      | 0                                            |
| Pimozide                  | 77.3251                            | 1                                       | 0.09                                    | 0.22                                    | 0.24                                      | 0                                            |
| Darunavir                 | 76.7142                            | 3.31                                    | 1.57                                    | 2.32                                    | 2.66                                      | 0                                            |
| Eltrombopag               | 75.0368                            | 4.39                                    | 8.62                                    | 5.19                                    | 6.17                                      | 0                                            |
| Ramipril                  | 72.0389                            | 3.38                                    | 10.22                                   | 4.46                                    | 4.25                                      | 1                                            |

**Figure S1.** Heatmap of the final results. Red color corresponds to unfavorable value of calculated parameters, while blue color corresponds to favorable value of calculated parameters. The most promising ligands are marked in red letters.

**Table S1.** PBPK input data based on literature information

| <b>Drug</b>      | <b>Dosage form</b> | <b>Dose (mg)</b> | <b>References/Notes</b>                                                                                 |
|------------------|--------------------|------------------|---------------------------------------------------------------------------------------------------------|
| Salvianolic acid | IV infusion        | 3                | Only animal data are available                                                                          |
| Pralmorelin      | IV bolus           | 0.10             | (Okano et al., 2010)                                                                                    |
| Venetoclax       | IR tablet          | 400              | (Salem et al., 2017)                                                                                    |
| Thymopentin      | IV infusion        | 50               | (Clumeck et al., 1985)                                                                                  |
| Ombitasvir       | IR tablet          | 12.50            | (Badri et al., 2017)                                                                                    |
| Ritonavir        | IR tablet          | 600              | ( <i>Norvir®</i> , EMA 2005, n.d.)                                                                      |
| Atorvastatin     | IR tablet          | 80               | (Chung et al., 2006)                                                                                    |
| Naringin         | IR capsule         | 500              | Only animal data are available                                                                          |
| Montelukast      | IR tablet          | 10               | (Graff et al., 2003)                                                                                    |
| Astilbin         | IV bolus           | 70               | Only animal data are available                                                                          |
| Dipiridamol      | IR tablet          | 100              | (Gregov et al., 1987)                                                                                   |
| Lopinavir        | IR tablet          | 200              | ( <i>Kaletra 200 Mg/50 Mg Film-Coated Tablets - Summary of Product Characteristics (SmPC) - (Emc)</i> ) |
| Fulvestrant      | IR tablet          | 400              | (Harrison et al., 2003)                                                                                 |
| Revefenacin      | IV infusion        | 0.02             | (Bourdet et al., 2018)                                                                                  |
| Carfilzomib      | IV bolus           | 60               | (Brown et al., 2017)                                                                                    |
| Elbasvir         | IR tablet          | 50               | (Marshall et al., 2018)                                                                                 |
| Dabigatran       | IR capsule         | 150              | (Joachim Stangier, 2008)                                                                                |
| Bimatoprost      | IV bolus           | 0.22             | ( <i>Lumigan®</i> , FDA 2006, 2020)                                                                     |
| Sulfapyrazone    | IR tablet          | 200              | (Lecaillon et al., 1979)                                                                                |
| Ticagrelor       | IR tablet          | 90               | (Holmberg et al., 2013)                                                                                 |
| Mitoxantrone     | IV bolus           | 2                | (Richard et al., 1992)                                                                                  |
| Cilnidipine      | IR tablet          | 10               | (Lee et al., 2014)                                                                                      |
| Selexipag        | IR tablet          | 1.60             | (Kaufmann et al., 2015)                                                                                 |
| Azilsartan       | IR tablet          | 80               | (Webb et al., 2016)                                                                                     |
| Telmisartan      | IR tablet          | 80               | (J. Stangier et al., 2000)                                                                              |
| Ramipril         | IR tablet          | 10               | ( <i>Ramipril Sandoz® Product Monograph</i> , 2018, n.d.)                                               |
| Lifitegrast      | IV bolus           | 3                | Only animal data are available                                                                          |
| Lomitapide       | IR capsule         | 60               | (Taubel et al., 2016)                                                                                   |
| Neohesperidin    | IR capsule         | 35               | (Bae et al., 2004)                                                                                      |
| Velpatasvir      | IR tablet          | 100              | (Mogalian et al., 2017)                                                                                 |
| Daclatasvir      | IR tablet          | 60               | (Bifano et al., 2013)                                                                                   |
| Lapatinib        | IR tablet          | 250              | ( <i>Tyverb®</i> , EMA 2015, n.d.)                                                                      |
| Bazedoxifene     | IR tablet          | 20               | (McKeand, 2017)                                                                                         |
| Vilanterol       | IV bolus           | 0.055            | (Allen et al., 2011)                                                                                    |
| Telaprevir       | IR tablet          | 375              | ( <i>Incivo®</i> , EMA 2011, n.d.)                                                                      |
| Penfluridol      | IR tablet          | 60               | (Migdalof et al., 1979)                                                                                 |
| Bortezomib       | IV bolus           | 3.50             | (Tan et al., 2019)                                                                                      |
| Repaglinide      | IR tablet          | 1                | (Hatorp, 2002)                                                                                          |
| Atazanavir       | IR capsule         | 300              | (Le Tiec et al., 2005)                                                                                  |
| Nintedanib       | IR capsule         | 150              | (Dallinger et al., 2016)                                                                                |
| Pimozide         | IR tablet          | 4                | ( <i>Orap® Product Information</i> , 2002, n.d.)                                                        |
| Darunavir        | IR tablet          | 800              | (Kakuda et al., 2014)                                                                                   |
| Eltrombopag      | IR tablet          | 25               | (Shida et al., 2011)                                                                                    |

**Table S2.** QSPR predicted data used as inputs for PBPK modeling

| Drug             | MW (g/mol) | logP   | pKa (s)                                                     | Intrinsic solubility (mg/ml) | Peff (cm/s) | DiffCoef (cm <sup>2</sup> /s) | RBP  | fup (%) | CLint (μL/min/mg HLM protein) |
|------------------|------------|--------|-------------------------------------------------------------|------------------------------|-------------|-------------------------------|------|---------|-------------------------------|
| Salvianolic acid | 718.63     | 3.88   | 12.02, 11.53, 11.05, 9.88, 9.38, 8.92, 8.35, 3.94, 3.17 (a) | 0.01                         | 0.26        | 0.49                          | 0.68 | 6.26    | 9.71                          |
| Pralmorelin      | 746.92     | 3.15   | 12.89 (a);<br>10.01, 8.02 (b)                               | 0.85                         | 0.13        | 0.43                          | 0.70 | 6.07    | 65.99                         |
| Venetoclax       | 868.46     | 6.84   | 11.61, 5.53 (a);<br>7.09, 3.17, 2.60, 0.96 (b)              | 2.14 x 10 <sup>-5</sup>      | 0.25        | 0.41                          | 0.71 | 2.72    | 213.87                        |
| Thymopentin      | 681.79     | -4.37  | 4.06, 3.37 (a);<br>10.94, 9.66, 7.84; 4.77, 0.61 (b)        | 9.64                         | 0.11        | 0.45                          | 0.79 | 82.35   | 10.64                         |
| Ombitasvir       | 894.13     | 5.49   | 11.77, 11.28, 10.84, 10.35 (a);<br>4.22 (b)                 | 5.00 x 10 <sup>-2</sup>      | 0.47        | 0.38                          | 0.66 | 5.79    | 440.77                        |
| Ritonavir        | 720.96     | 4.2    | 11.83, 11.18 (a);<br>4.46; 2.47 (b)                         | 0.01                         | 0.47        | 0.44                          | 0.64 | 3.67    | 1387.57                       |
| Atorvastatin     | 558.65     | 4.28   | 11.05, 4.71 (a);                                            | 0.15                         | 1.73        | 0.51                          | 0.67 | 5.04    | 40.11                         |
| Naringin         | 582.56     | -0.27  | 10.20, 9.36, 7.13 (a)                                       | 4.91                         | 0.11        | 0.54                          | 0.69 | 24.29   | 4.06                          |
| Montelukast      | 586.2      | 7.55   | 4.80 (a);<br>4.03 (b)                                       | 2.63 x 10 <sup>-5</sup>      | 1.72        | 0.50                          | 0.66 | 2.81    | 275.39                        |
| Astilbin         | 594.53     | 1.74   | 11.77, 11.23, 10.69, 10.24, 9.77, 9.30, 8.80, 8.19 (a)      | 0.08                         | 0.23        | 0.56                          | 0.76 | 10.57   | 18.49                         |
| Dipiridamol      | 504.64     | 3.04   | 5.83, 3.56, 1.83, 1.63, 1.43, 1.13, 0.71, 0.29 (b)          | 2.34                         | 0.45        | 0.55                          | 0.67 | 8.99    | 15.50                         |
| Lopinavir        | 628.82     | 3.53   | 12.31 (a)                                                   | 0.01                         | 0.71        | 0.46                          | 0.64 | 5.24    | 1981.52                       |
| Fulvestrant      | 606.78     | 7.2    | 10.75 (a)                                                   | 2.00 x 10 <sup>-2</sup>      | 2.39        | 0.49                          | 0.67 | 2.81    | 15000.00                      |
| Revefenacin      | 597.76     | 3.89   | 11.00 (a);<br>7.90, 6.82 (b)                                | 0.08                         | 0.70        | 0.49                          | 0.72 | 5.40    | 50.00                         |
| Carfilzomib      | 719.93     | 3.26   | 5.61 (b)                                                    | 0.05                         | 0.32        | 0.43                          | 0.65 | 8.17    | 1249.06                       |
| Elbasvir         | 882.04     | 6.34   | 11.19, 10.75, 10.39, 9.94 (a);<br>4.54, 3.84 (b)            | 3.00 x 10 <sup>-2</sup>      | 0.59        | 0.40                          | 0.69 | 4.03    | 87.32                         |
| Dabigatran       | 627.75     | 5.55   | 10.65 (a);<br>6.02, 3.82, 2.88, 2.36,<br>-0.71 (b)          | 0.03                         | 1.12        | 0.48                          | 0.67 | 3.84    | 141.73                        |
| Bimatoprost      | 415.58     | 2.76   | /                                                           | 0.13                         | 1.17        | 0.57                          | 0.67 | 9.37    | 183.49                        |
| Sulfinpyrazone   | 404.49     | 2.21   | 6.69 (a)                                                    | 0.30                         | 4.07        | 0.64                          | 0.69 | 4.91    | 14.17                         |
| Ticagrelor       | 522.58     | 3.52   | 2.82, 0.98, 0.18,<br>-0.57, -2.53 (a)                       | 0.77                         | 1.25        | 0.58                          | 0.70 | 5.15    | 26.16                         |
| Mitoxantrone     | 444.49     | 0.0685 | 6.89 (a);<br>9.61, 8.96, 8.30,<br>-1.50, -2.27 (b)          | 0.53                         | 0.30        | 0.60                          | 1.01 | 40.95   | 15.73                         |

|               |        |       |                                                   |                       |      |      |      |       |         |
|---------------|--------|-------|---------------------------------------------------|-----------------------|------|------|------|-------|---------|
| Cilnidipine   | 492.53 | 5.41  | 11.21 (a);<br>1.81 (b)                            | $1.00 \times 10^{-2}$ | 1.10 | 0.56 | 0.70 | 4.19  | 45.87   |
| Selexipag     | 496.63 | 4.05  | 6.06 (a);<br>4.41, 2.13, 0.29 (b)                 | 0.02                  | 0.97 | 0.54 | 0.66 | 4.42  | 25.93   |
| Azilsartan    | 568.55 | 4.53  | 5.28 (a);<br>2.25; -3.70 (b)                      | $1.00 \times 10^{-2}$ | 2.96 | 0.56 | 0.68 | 4.71  | 10.99   |
| Telmisartan   | 514.63 | 5.8   | 4.03, 3.43 (a)                                    | 0.06                  | 1.11 | 0.54 | 0.68 | 3.42  | 27.30   |
| Ramipril      | 416.52 | 1.43  | 3.45 (a);<br>6.05 (b)                             | 1.26                  | 0.51 | 0.60 | 0.70 | 10.13 | 8.75    |
| Lifitegrast   | 615.49 | 3.76  | 10.49, 3.53 (a);                                  | $3.77 \times 10^{-5}$ | 0.95 | 0.53 | 0.66 | 4.20  | 18.33   |
| Lomitapide    | 693.74 | 6.87  | 11.24 (a);<br>7.52 (b)                            | $5.12 \times 10^{-5}$ | 2.05 | 0.47 | 0.67 | 2.45  | 1200.07 |
| Neohesperidin | 610.57 | -0.46 | 9.85, 8.15 (a);                                   | 6.64                  | 0.11 | 0.54 | 0.72 | 32.86 | 5.30    |
| Velpatasvir   | 883.02 | 5.48  | 11.43, 10.96, 10.56, 10.10 (a);<br>4.43, 3.14 (b) | $1.00 \times 10^{-2}$ | 0.52 | 0.41 | 0.67 | 4.27  | 76.37   |
| Daclatasvir   | 738.89 | 4.03  | 11.34, 10.96, 10.57, 10.21 (a);<br>4.67, 3.92 (b) | 0.01                  | 0.71 | 0.44 | 0.67 | 5.37  | 37.19   |
| Lapatinib     | 581.07 | 5.18  | 6.53, 4.12, 0.60,<br>-0.98 (b)                    | $2.76 \times 10^{-4}$ | 0.72 | 0.53 | 0.68 | 2.45  | 2638.02 |
| Bazedoxifene  | 470.62 | 6.18  | 10.78, 10.00 (a);<br>8.16 (b)                     | 0.07                  | 1.33 | 0.56 | 0.75 | 4.72  | 458.07  |
| Vilanterol    | 486.44 | 4.24  | 10.34 (a);<br>8.99 (b)                            | 0.39                  | 0.72 | 0.56 | 0.70 | 8.12  | 79.11   |
| Telaprevir    | 679.87 | 2.59  | 11.46, 10.88 (a);<br>1.88, -1.92 (b)              | 0.45                  | 0.70 | 0.45 | 0.67 | 10.74 | 276.02  |
| Penfluridol   | 523.98 | 6.8   | 7.80 (b)                                          | $7.29 \times 10^{-5}$ | 2.87 | 0.56 | 0.75 | 4.66  | 3727.52 |
| Bortezomib    | 384.25 | 1.32  | 12.74, 11.20, 6.52 (a);<br>1.38, -2.87 (b)        | 6.72                  | 0.69 | 0.64 | 0.66 | 15.97 | 25.08   |
| Repaglinide   | 452.6  | 4.9   | 4.56 (a);<br>5.62 (b)                             | 0.06                  | 0.85 | 0.56 | 0.70 | 4.19  | 40.54   |
| Atazanavir    | 704.87 | 3.36  | 11.51, 10.97, 10.42 (a);<br>4.63, 3.66 (b)        | 0.01                  | 0.42 | 0.44 | 0.64 | 8.33  | 257.16  |
| Nintedanib    | 539.64 | 3.94  | 11.21, 9.94 (a);<br>8.11, 2.55, -0.72 (b)         | 0.13                  | 1.20 | 0.53 | 0.72 | 7.91  | 80.29   |
| Pimozide      | 461.56 | 6.05  | 12.56 (a);<br>8.30 (b)                            | $2.00 \times 10^{-2}$ | 2.18 | 0.58 | 0.74 | 4.60  | 62.19   |
| Darunavir     | 547.67 | 1.93  | 11.32 (a);<br>3.37 (b)                            | 0.10                  | 0.37 | 0.53 | 0.68 | 9.50  | 44.92   |
| Eltrombopag   | 442.48 | 4.92  | 9.09, 3.80 (a);<br>-1.30, -3.04, -4.07 (b)        | $1.78 \times 10^{-4}$ | 5.20 | 0.61 | 0.68 | 3.93  | 8.91    |

MW - molecular weight; (a) - acidic pKa value(s); (b) - basic pKa value(s); Peff - human effective permeability; DiffCoef - diffusion coefficient; RBP - blood/plasma concentration ratio; fup - plasma fraction unbound; CLint – overall human liver microsomal intrinsic clearance

**Table S3.** Interactions (mRNA expression, protein expression, gene expression and protein secretion) between the candidate drugs and genes obtained from the CTD database (<http://ctdbase.org>)

| Gene   | Interaction        | Atorvastatin | Naringin | Lopinavir | Fulvestrant | Telmisartan | Ramipril | Bortezomib | Atazanavir | Ritonavir | Salvianolic acid B | Dipyridamole |
|--------|--------------------|--------------|----------|-----------|-------------|-------------|----------|------------|------------|-----------|--------------------|--------------|
| ACE2   | mRNA expression    | ↑            |          |           |             | ↑↓          |          |            |            |           |                    |              |
|        | Protein expression | ↑            |          |           |             | ↑↓          |          |            |            |           |                    |              |
| AGT    | mRNA expression    |              |          |           |             | ↓           |          |            |            |           |                    |              |
|        | Protein expression |              |          |           |             | ↓           | ↓        |            |            |           |                    |              |
| CCL2   | mRNA expression    | ↓            |          | ↑         |             |             | ↓        | ↓          |            |           |                    |              |
|        | Protein expression |              |          |           |             | ↓           |          |            | ↑          | ↑         |                    |              |
|        | Gene expression    |              |          |           |             |             |          |            |            | ↓         |                    |              |
|        | Protein secretion  |              |          | ↑         |             |             |          |            |            | ↑         |                    |              |
| CCL3   | mRNA expression    |              |          |           |             |             |          | ↑↓         |            |           |                    |              |
|        | Protein expression |              |          | ↑         |             |             |          | ↑          | ↑          | ↑         |                    |              |
|        | Gene expression    |              |          |           |             |             |          |            |            | ↓         |                    |              |
| CRP    | Protein expression | ↓            |          |           |             | ↓           |          |            |            |           | ↓                  |              |
| CSF3   | mRNA expression    |              |          |           | ↓           |             |          |            |            |           |                    |              |
| CXCL10 | Protein expression | ↓            |          |           |             |             |          |            |            |           |                    |              |
|        | Gene expression    |              |          |           |             |             |          |            |            | ↓         |                    |              |
|        | Protein expression |              |          |           |             | ↑           |          |            |            |           |                    |              |
| IL1B   | mRNA expression    |              |          | ↑         | ↑           |             |          |            |            |           |                    |              |
|        | Protein activity   |              | ↓        |           |             |             |          |            |            |           |                    |              |
| IL2    | mRNA expression    |              |          |           |             |             |          |            |            |           |                    | ↓            |
|        | Protein expression |              |          |           |             |             |          | ↓          |            |           |                    |              |
| IL6    | mRNA expression    | ↓            |          |           | ↑           | ↓           |          | ↑          |            | ↑         |                    |              |
|        | Protein expression | ↓            | ↓        | ↑         |             | ↓           |          | ↓          |            | ↑         |                    |              |
|        | Protein secretion  | ↓            |          | ↑         |             |             |          | ↓          |            | ↑         |                    |              |
| IL7    | mRNA expression    |              |          |           |             |             |          |            |            | ↓         |                    |              |
|        | Protein expression |              |          |           |             |             |          |            |            | ↓         |                    |              |
| CXCL8  | mRNA expression    | ↓            |          |           | ↑           | ↓           |          | ↑          |            |           |                    |              |
|        | Protein expression | ↓            |          |           |             |             |          |            |            |           |                    |              |
|        | Gene expression    | ↓            |          |           |             |             |          |            |            |           |                    |              |
|        | Protein secretion  | ↓            |          |           |             |             |          | ↑          |            |           |                    |              |
| TNF    | mRNA expression    | ↓            |          | ↑         |             |             |          |            |            | ↑         |                    | ↓            |
|        | Protein expression | ↓            |          |           |             | ↓           |          |            |            | ↓         |                    |              |
|        | Protein secretion  | ↓            |          |           |             |             |          |            |            | ↓         |                    |              |











## References

- Allen, A., Bianco, J., Bal, J., Tombs, L., & Kempford, R. (2011). The absolute bioavailability of fluticasone furoate (FF) and vilanterol (VI) trifenate following inhaled administration in combination in healthy subjects. *European Respiratory Journal*, 38(Suppl 55). [https://erj.ersjournals.com/content/38/Suppl\\_55/p3976](https://erj.ersjournals.com/content/38/Suppl_55/p3976)
- Badri, P. S., Shuster, D. L., Dutta, S., & Menon, R. M. (2017). Clinical Pharmacokinetics of Ombitasvir. *Clinical Pharmacokinetics*, 56(10), 1103–1113. <https://doi.org/10.1007/s40262-017-0518-4>
- Bae, K. H., Bok, S. H., Choi, M. S., Choi, Y. K., Hyun, B. H., Jeong, T. S., Kim, H. S., Kwon, Y. K., Lee, C. H., Lee, E. S., Lee, S. B., Moon, S. S., Park, Y. B., & Park, Y. B. (2004). *Use of neohesperidin dihydrochalcone for the manufacture of a medicament for preventing or treating elevated blood lipid level-related diseases* (European Union Patent No. EP1113726B1). <https://patents.google.com/patent/EP1113726B1/en>
- Bifano, M., Hwang, C., Oosterhuis, B., Hartstra, J., Grasela, D., Tiessen, R., Velinova-Donga, M., Kandoussi, H., Sevinsky, H., & Bertz, R. (2013). Assessment of pharmacokinetic interactions of the HCV NS5A replication complex inhibitor daclatasvir with antiretroviral agents: Ritonavir-boosted atazanavir, efavirenz and tenofovir. *Antiviral Therapy*, 18(7), 931–940. <https://doi.org/10.3851/IMP2674>
- Bourdet, D., Yeola, S., Colson, P.-J., Pendyala, S., Barnes, C. n., & Borin, M. (2018). Absorption, Distribution, Metabolism, and Excretion of Revefenacin, a Long-Acting Muscarinic Antagonist (LAMA), in Healthy Male Subjects. In *B33. COPD: MAINTENANCE THERAPY* (Vol. 1–308, pp. A3033–A3033). American Thoracic Society. [https://doi.org/10.1164/ajrccm-conference.2018.197.1\\_MeetingAbstracts.A3033](https://doi.org/10.1164/ajrccm-conference.2018.197.1_MeetingAbstracts.A3033)
- Brown, J., Plummer, R., Bauer, T. M., Anthony, S., Sarantopoulos, J., De Vos, F., White, M., Schupp, M., Ou, Y., & Vaishampayan, U. (2017). Pharmacokinetics of carfilzomib in patients with advanced malignancies and varying degrees of hepatic impairment: An open-label, single-arm, phase 1 study. *Experimental Hematology & Oncology*, 6, 27. <https://doi.org/10.1186/s40164-017-0086-1>
- Chung, M., Calcagni, A., Glue, P., & Bramson, C. (2006). Effect of food on the bioavailability of amlodipine besylate/atorvastatin calcium combination tablet. *Journal of Clinical Pharmacology*, 46(10), 1212–1216. <https://doi.org/10.1177/0091270006291097>
- Clumeck, N., Cran, S., Van de Perre, P., Mascart-Lemone, F., Duchateau, J., & Bolla, K. (1985). Thymopentin treatment in AIDS and pre-AIDS patients. *Survey of Immunologic Research*, 4 Suppl 1, 58–62. <https://doi.org/10.1007/BF02919057>
- Dallinger, C., Trommeshauser, D., Marzin, K., Liesener, A., Kaiser, R., & Stopfer, P. (2016). Pharmacokinetic Properties of Nintedanib in Healthy Volunteers and Patients With Advanced Cancer. *Journal of Clinical Pharmacology*, 56(11), 1387–1394. <https://doi.org/10.1002/jcph.752>
- Graff, G. R., Weber, A., Wessler-Starman, D., & Smith, A. L. (2003). Montelukast pharmacokinetics in cystic fibrosis. *The Journal of Pediatrics*, 142(1), 53–56. <https://doi.org/10.1067/mpd.2003.mpd0332>
- Gregov, D., Jenkins, A., Duncan, E., Siebert, D., Rodgers, S., Duncan, B., Bochner, F., & Lloyd, J. (1987). Dipyridamole: Pharmacokinetics and effects on aspects of platelet function in man. *British Journal of Clinical Pharmacology*, 24(4), 425–434.
- Harrison, M., Laight, A., Clarke, D., Giles, P., & Yates, Y. (2003, January 18). *Pharmacokinetics and metabolism of fulvestrant after oral, intravenous and intramuscular administration in healthy volunteers*. EJC Suppl.s. <https://eurekamag.com/research/035/486/035486494.php>
- Hatorp, V. (2002). Clinical pharmacokinetics and pharmacodynamics of repaglinide. *Clinical Pharmacokinetics*, 41(7), 471–483. <https://doi.org/10.2165/00003088-200241070-00002>
- Holmberg, M. T., Tornio, A., Joutsu-Korhonen, L., Neuvonen, M., Neuvonen, P. J., Lassila, R., Niemi, M., & Backman, J. T. (2013). Grapefruit juice markedly increases the plasma concentrations and antiplatelet effects of ticagrelor in healthy subjects. *British Journal of Clinical Pharmacology*, 75(6), 1488–1496. <https://doi.org/10.1111/bcp.12026>
- Incivo®*, EMA 2011. (n.d.). Retrieved May 29, 2020, from [https://www.ema.europa.eu/en/documents/product-information/incivo-epar-product-information\\_en.pdf](https://www.ema.europa.eu/en/documents/product-information/incivo-epar-product-information_en.pdf)
- Kakuda, T. N., Brochot, A., Tomaka, F. L., Vangeneugden, T., Van De Castele, T., & Hoetelmans, R. M. W. (2014). Pharmacokinetics and pharmacodynamics of boosted once-daily darunavir. *The Journal of Antimicrobial Chemotherapy*, 69(10), 2591–2605. <https://doi.org/10.1093/jac/dku193>
- Kaletra 200 mg/50 mg film-coated tablets—Summary of Product Characteristics (SmPC)—(Emc)*. (n.d.). Retrieved June 16, 2020, from <https://www.medicines.org.uk/emc/product/221>
- Kaufmann, P., Okubo, K., Bruderer, S., Mant, T., Yamada, T., Dingemans, J., & Mukai, H. (2015). Pharmacokinetics and Tolerability of the Novel Oral Prostacyclin IP Receptor Agonist Selexipag.

- American Journal of Cardiovascular Drugs: Drugs, Devices, and Other Interventions*, 15(3), 195–203.  
<https://doi.org/10.1007/s40256-015-0117-4>
- Le Tiec, C., Barrail, A., Goujard, C., & Taburet, A.-M. (2005). Clinical pharmacokinetics and summary of efficacy and tolerability of atazanavir. *Clinical Pharmacokinetics*, 44(10), 1035–1050.  
<https://doi.org/10.2165/00003088-200544100-00003>
- Lecaillon, J. B., Souppart, C., Schoeller, J.-P., Humbert, G., & Massias, P. (1979). Sulfinpyrazone kinetics after intravenous and oral administration. *Clinical Pharmacology & Therapeutics*, 26(5), 611–617.  
<https://doi.org/10.1002/cpt1979265611>
- Lee, J., Lee, H., Jang, K., Lim, K. S., Shin, D., & Yu, K.-S. (2014). Evaluation of the pharmacokinetic and pharmacodynamic drug interactions between cilnidipine and valsartan, in healthy volunteers. *Drug Design, Development and Therapy*, 8, 1781–1788. <https://doi.org/10.2147/DDDT.S68574>
- Lumigan®, FDA 2006. (2020, May 29).  
[https://www.accessdata.fda.gov/drugsatfda\\_docs/label/2006/021275s013lbl.pdf](https://www.accessdata.fda.gov/drugsatfda_docs/label/2006/021275s013lbl.pdf)
- Marshall, W. L., Feng, H.-P., Wenning, L., Garrett, G., Huang, X., Liu, F., Panebianco, D., Caro, L., Fandozzi, C., Lasseter, K. C., Preston, R. A., Marbury, T., Butterton, J. R., Iwamoto, M., & Yeh, W. W. (2018). Pharmacokinetics, Safety, and Tolerability of Single-Dose Elbasvir in Participants with Hepatic Impairment. *European Journal of Drug Metabolism and Pharmacokinetics*, 43(3), 321–329.  
<https://doi.org/10.1007/s13318-017-0451-9>
- McKeand, W. (2017). Pharmacokinetics, Dose Proportionality, and Bioavailability of Bazedoxifene in Healthy Postmenopausal Women. *Clinical Therapeutics*, 39(9), 1769–1779.  
<https://doi.org/10.1016/j.clinthera.2017.07.012>
- Migdalof, B. H., Grindel, J. M., Heykants, J. J., & Janssen, P. A. (1979). Penfluridol: A neuroleptic drug designed for long duration of action. *Drug Metabolism Reviews*, 9(2), 281–299.  
<https://doi.org/10.3109/03602537908993895>
- Mogalian, E., German, P., Kearney, B. P., Yang, C. Y., Brainard, D., Link, J., McNally, J., Han, L., Ling, J., & Mathias, A. (2017). Preclinical Pharmacokinetics and First-in-Human Pharmacokinetics, Safety, and Tolerability of Velpatasvir, a Pangenotypic Hepatitis C Virus NS5A Inhibitor, in Healthy Subjects. *Antimicrobial Agents and Chemotherapy*, 61(5). <https://doi.org/10.1128/AAC.02084-16>
- Norvir®, EMA 2005. (n.d.). Retrieved May 29, 2020, from [https://www.ema.europa.eu/en/documents/scientific-discussion/norvir-epar-scientific-discussion\\_en.pdf](https://www.ema.europa.eu/en/documents/scientific-discussion/norvir-epar-scientific-discussion_en.pdf)
- Okano, M., Sato, M., Ikekita, A., & Kageyama, S. (2010). Determination of growth hormone secretagogue pralmorelin (GHRP-2) and its metabolite in human urine by liquid chromatography/electrospray ionization tandem mass spectrometry. *Rapid Communications in Mass Spectrometry: RCM*, 24(14), 2046–2056. <https://doi.org/10.1002/rcm.4619>
- Orap® product information, 2002. (n.d.). Retrieved May 29, 2020, from <https://www.medicines.org.uk/emc/product/6911/smpc>
- Ramipril Sandoz® product monograph, 2018. (n.d.). Retrieved May 29, 2020, from <https://www.sandoz.ca/sites/www.sandoz.ca/files/Ramipril%20Tab%20Product%20Monograph.pdf>
- Richard, B., Launay-Iliadis, M. C., Iliadis, A., Just-Landi, S., Blaise, D., Stoppa, A. M., Viens, P., Gaspard, M. H., Maraninchi, D., & Cano, J. P. (1992). Pharmacokinetics of mitoxantrone in cancer patients treated by high-dose chemotherapy and autologous bone marrow transplantation. *British Journal of Cancer*, 65(3), 399–404.
- Salem, A. H., Agarwal, S. K., Dunbar, M., Enschede, S. L. H., Humerickhouse, R. A., & Wong, S. L. (2017). Pharmacokinetics of Venetoclax, a Novel BCL-2 Inhibitor, in Patients With Relapsed or Refractory Chronic Lymphocytic Leukemia or Non-Hodgkin Lymphoma. *The Journal of Clinical Pharmacology*, 57(4), 484–492. <https://doi.org/10.1002/jcph.821>
- Shida, Y., Takahashi, N., Nohda, S., & Hiramata, T. (2011). Pharmacokinetics and Pharmacodynamics of Eltrombopag in Healthy Japanese Males. *Rinsho Yakuri/Japanese Journal of Clinical Pharmacology and Therapeutics*, 42(1), 11–20. <https://doi.org/10.3999/jscpt.42.11>
- Stangier, J., Su, C. A., & Roth, W. (2000). Pharmacokinetics of orally and intravenously administered telmisartan in healthy young and elderly volunteers and in hypertensive patients. *The Journal of International Medical Research*, 28(4), 149–167. <https://doi.org/10.1177/147323000002800401>
- Stangier, Joachim. (2008). Clinical pharmacokinetics and pharmacodynamics of the oral direct thrombin inhibitor dabigatran etexilate. *Clinical Pharmacokinetics*, 47(5), 285–295. <https://doi.org/10.2165/00003088-200847050-00001>
- Tan, C. R. C., Abdul-Majeed, S., Cael, B., & Barta, S. K. (2019). Clinical Pharmacokinetics and Pharmacodynamics of Bortezomib. *Clinical Pharmacokinetics*, 58(2), 157–168.  
<https://doi.org/10.1007/s40262-018-0679-9>

- Taubel, J., Sumeray, M., Lorch, U., & McLean, A. (2016). Pharmacokinetics and Pharmacodynamics of Lomitapide in Japanese Subjects. *Journal of Atherosclerosis and Thrombosis*, 23(5), 606–620. <https://doi.org/10.5551/jat.30452>
- Tyverb®, EMA 2015. (n.d.). Retrieved May 29, 2020, from [https://www.ema.europa.eu/en/documents/product-information/tyverb-epar-product-information\\_en.pdf](https://www.ema.europa.eu/en/documents/product-information/tyverb-epar-product-information_en.pdf)
- Webb, N. J. A., Wells, T., Tsai, M., Zhao, Z., Juhasz, A., & Dudkowski, C. (2016). Single-dose pharmacokinetics and safety of azilsartan medoxomil in children and adolescents with hypertension as compared to healthy adults. *European Journal of Clinical Pharmacology*, 72(4), 447–457. <https://doi.org/10.1007/s00228-015-1987-8>
